# Supplementary material for: The conformational landscape of 2-(4-fluoro-phenyl)-ethylamine: consequences of fluorine substitution at the para position
Source: Royal Society of Chemistry journal article supplement (doi:10.1039/c6cp06456f), 2016-11-22

**Supplementary Information for**

**The conformational landscape of 2-(4-fluoro-phenyl)-ethylamine: Consequences of  
fluorine substitution at the *para*-position**

*Afik Shachar, Nitzan Mayorkas, Hanan Sachs, and Ilana Bar\**

**Table S1.** The numbering of the normal vibrations, their transition frequencies (cm<sup>-1</sup>) and intensities (arb. units) as obtained from the measured ionization-loss stimulated Raman and from the scaled harmonic Raman spectra, computed at the M06-2X/6-311++G(d,p) level of theory, for the G1, G2 and A2 conformers of 2-(4-fluoro-phenyl)-ethylamine.

|                 | G1         |      |          |      | G2              |        |          |        | A2         |                       |          |      |        |      |
|-----------------|------------|------|----------|------|-----------------|--------|----------|--------|------------|-----------------------|----------|------|--------|------|
|                 | Calculated |      | Measured |      | Calculated      |        | Measured |        | Calculated |                       | Measured |      |        |      |
|                 | Freq.      | Int. | Freq.    | Int. | Freq.           | Int.   | Freq.    | Int.   | Freq.      | Int.                  | Freq.    | Int. |        |      |
| v <sub>1</sub>  | 3427.9     | 0.31 | 3416.2   | 0.44 | v <sub>1</sub>  | 3421.4 | 0.24     | 3408.5 | 0.50       | v <sub>31</sub> (A'') | 3427.6   | 0.29 | 3418.4 | 0.39 |
| v <sub>2</sub>  | 3347.3     | 0.88 | 3347.6   | 0.77 | v <sub>2</sub>  | 3341.5 | 0.69     | 3344.1 | 1.07       | v <sub>1</sub> (A')   | 3347.4   | 0.80 | 3351.1 | 1.01 |
|                 |            |      | 3230.5   | 0.16 | v <sub>3</sub>  | 3080.4 | 1.18     |        |            | v <sub>2</sub> (A')   | 3079.1   | 1.92 |        |      |
|                 |            |      | 3207.9   | 0.13 | v <sub>4</sub>  | 3078.6 | 1.13     | 3083.0 | 1.46       | v <sub>32</sub> (A'') | 3079.1   | 1.92 | 3084.5 | 1.00 |
| v <sub>3</sub>  | 3081.2     | 1.01 |          |      | v <sub>5</sub>  | 3047.5 | 0.40     | 3054.3 | 0.40       | v <sub>3</sub> (A')   | 3044.1   | 0.57 |        |      |
| v <sub>4</sub>  | 3079.0     | 0.99 | 3085.0   | 1.00 | v <sub>6</sub>  | 3044.4 | 0.42     | 3049.6 | 0.39       | v <sub>33</sub> (A'') | 3043.8   | 0.57 | 3051.6 | 0.38 |
| v <sub>5</sub>  | 3053.1     | 0.31 | 3059.7   | 0.35 |                 |        |          | 3027.0 | 0.48       |                       |          |      | 3024.7 | 0.32 |
| v <sub>6</sub>  | 3043.2     | 0.39 | 3051.4   | 0.30 |                 |        |          | 3014.1 | 0.26       | v <sub>34</sub> (A'') | 2970.0   | 0.01 |        |      |
|                 |            |      | 3027.2   | 0.38 |                 |        |          | 2976.8 | 0.36       | v <sub>35</sub> (A'') | 2933.1   | 0.45 | 2943.9 | 0.33 |
|                 |            |      | 3016.4   | 0.24 | v <sub>7</sub>  | 2966.7 | 0.43     | 2948.2 | 1.15       | v <sub>4</sub> (A')   | 2911.0   | 0.19 | 2925.6 | 0.33 |
| v <sub>7</sub>  | 2977.6     | 0.28 | 2961.1   | 0.77 |                 |        |          | 2944.1 | 0.10       | v <sub>5</sub> (A')   | 2897.2   | 1.56 | 2909.9 | 0.70 |
| v <sub>8</sub>  | 2941.1     | 1.43 | 2936.2   | 0.67 | v <sub>8</sub>  | 2943.2 | 0.92     | 2926.6 | 0.92       |                       |          |      | 2885.4 | 0.34 |
| v <sub>9</sub>  | 2915.7     | 0.85 | 2920.5   | 0.45 |                 |        |          | 2902.6 | 0.46       |                       |          |      | 2876.3 | 0.37 |
|                 |            |      | 2871.5   | 0.30 | v <sub>9</sub>  | 2908.6 | 1.47     | 2882.2 | 0.68       |                       |          |      | 2866.9 | 0.41 |
|                 |            |      | 2862.4   | 0.32 | v <sub>10</sub> | 2901.2 | 1.22     | 2862.1 | 0.61       |                       |          |      | 2853.9 | 0.22 |
| v <sub>10</sub> | 2844.6     | 0.88 | 2849.6   | 0.46 |                 |        |          | 2788.0 | 0.35       | v <sub>6</sub> (A')   | 1642.7   | 0.38 |        |      |
|                 |            |      | 2747.4   | 0.26 |                 |        |          | 2769.0 | 0.34       | v <sub>36</sub> (A'') | 1627.4   | 0.09 |        |      |
| v <sub>11</sub> | 1642.1     | 0.29 | 1633.6   | 0.23 | v <sub>11</sub> | 1641.6 | 0.35     | 1636.8 | 0.45       | v <sub>7</sub> (A')   | 1622.2   | 0.07 |        |      |
| v <sub>17</sub> | 1422.7     | 0.01 | 1416.8   | 0.13 | v <sub>17</sub> | 1421.6 | <0.01    |        |            | v <sub>38</sub> (A'') | 1351.0   | 0.10 |        |      |
| v <sub>18</sub> | 1383.1     | 0.06 | 1396.1   | 0.20 | v <sub>18</sub> | 1356.7 | 0.24     | 1363.0 | 0.62       | v <sub>39</sub> (A'') | 1306.7   | 0.04 | 1310.6 | 0.23 |
| v <sub>19</sub> | 1331.2     | 0.48 | 1336.4   | 0.41 | v <sub>19</sub> | 1352.6 | 0.02     |        |            | v <sub>40</sub> (A'') | 1283.0   | 0.05 |        |      |
| v <sub>20</sub> | 1311.0     | 0.13 | 1316.1   | 0.14 | v <sub>20</sub> | 1320.8 | 0.36     | 1327.6 | 0.78       | v <sub>12</sub> (A')  | 1280.8   | 0.40 | 1283.6 | 0.80 |
| v <sub>21</sub> | 1296.8     | 0.04 | 1304.0   | 0.14 | v <sub>21</sub> | 1296.0 | 0.11     | 1305.0 | 0.39       | v <sub>41</sub> (A'') | 1262.1   | 0.03 |        |      |
| v <sub>22</sub> | 1282.6     | 0.03 | 1288.7   | 0.09 | v <sub>22</sub> | 1282.2 | 0.03     |        |            | v <sub>13</sub> (A')  | 1251.2   | 0.68 |        |      |

|                 |        |       |        |      |                 |        |       |        |      |                       |        |        |        |      |
|-----------------|--------|-------|--------|------|-----------------|--------|-------|--------|------|-----------------------|--------|--------|--------|------|
| v <sub>23</sub> | 1250.7 | 0.74  | 1241.4 | 0.61 | v <sub>23</sub> | 1251.2 | 0.9   | 1228.9 | 0.63 |                       |        | 1227.4 | 0.53   |      |
|                 |        |       | 1231.1 | 0.49 | v <sub>24</sub> | 1209.5 | 0.21  | 1208.3 | 0.99 | v <sub>14</sub> (A')  | 1202.1 | 0.53   | 1205.2 | 0.49 |
| v <sub>24</sub> | 1202.8 | 0.34  | 1209.5 | 0.77 | v <sub>25</sub> | 1200.3 | 0.61  | 1202.6 | 0.95 | v <sub>15</sub> (A')  | 1148.9 | 0.14   | 1150.0 | 0.20 |
| v <sub>25</sub> | 1183.7 | 0.06  | 1185.9 | 0.18 | v <sub>26</sub> | 1149.0 | 0.16  | 1151.3 | 0.20 | v <sub>42</sub> (A'') | 1105.0 | <0.01  |        |      |
| v <sub>26</sub> | 1149.1 | 0.16  | 1161.1 | 0.45 | v <sub>27</sub> | 1127.9 | 0.09  | 1137.5 | 0.44 | v <sub>16</sub> (A')  | 1092.6 | 0.13   |        |      |
| v <sub>27</sub> | 1138.6 | 0.10  | 1141.5 | 0.52 | v <sub>28</sub> | 1095.4 | 0.03  | 1097.7 | 0.20 | v <sub>43</sub> (A'') | 1074.2 | 0.05   |        |      |
| v <sub>28</sub> | 1093.8 | 0.05  | 1099.2 | 0.18 | v <sub>29</sub> | 1073.2 | 0.09  | 1073.2 | 0.23 | v <sub>17</sub> (A')  | 1023.7 | 0.59   | 1020.1 | 0.84 |
| v <sub>29</sub> | 1087.6 | 0.12  | 1084.3 | 0.20 |                 |        |       | 1033.1 | 0.26 | v <sub>18</sub> (A')  | 1009.0 | 0.01   |        |      |
| v <sub>30</sub> | 1028.3 | 0.09  | 1024.6 | 0.38 | v <sub>30</sub> | 1009.3 | 0.01  |        |      | v <sub>44</sub> (A'') | 964.9  | <0.01  |        |      |
| v <sub>31</sub> | 1009.5 | 0.01  |        |      | v <sub>31</sub> | 988.7  | 0.17  | 992.0  | 0.84 | v <sub>45</sub> (A'') | 945.5  | <0.01  |        |      |
| v <sub>32</sub> | 966.8  | <0.01 |        |      | v <sub>32</sub> | 965.5  | <0.01 |        |      | v <sub>19</sub> (A')  | 939.7  | 0.06   | 941.7  | 0.47 |
| v <sub>33</sub> | 942.5  | <0.01 |        |      | v <sub>33</sub> | 943.8  | <0.01 |        |      |                       |        |        | 857.3  | 0.63 |
| v <sub>34</sub> | 908.6  | 0.19  | 913.1  | 0.23 | v <sub>34</sub> | 903.4  | 0.24  | 911.9  | 0.76 | v <sub>20</sub> (A')  | 854.8  | 1.15   | 851.7  | 1.00 |
| v <sub>35</sub> | 872.0  | 0.20  | 876.0  | 0.47 |                 |        |       | 888.9  | 0.3  | v <sub>21</sub> (A')  | 838.1  | 0.59   | 832.5  | 0.49 |
|                 |        |       | 845.2  | 0.50 | v <sub>35</sub> | 865.1  | 0.07  | 864.5  | 0.65 | v <sub>46</sub> (A'') | 824.9  | 0.01   |        |      |
| v <sub>36</sub> | 835.0  | 1.83  | 839.7  | 1.00 | v <sub>36</sub> | 838.5  | 3.81  | 841.2  | 0.51 | v <sub>22</sub> (A')  | 815.9  | 0.20   | 810.8  | 0.49 |
| v <sub>37</sub> | 834.1  | 0.24  |        |      | v <sub>37</sub> | 826.6  | 0.17  | 823.5  | 0.55 |                       |        |        | 781.1  | 0.74 |
| v <sub>38</sub> | 826.7  | 0.01  | 823.5  | 0.92 | v <sub>38</sub> | 822.2  | 0.22  | 819.7  | 0.44 | v <sub>23</sub> (A')  | 762.9  | 0.09   | 755.2  | 0.67 |
| v <sub>39</sub> | 819.7  | 0.03  | 816.3  | 0.37 | v <sub>39</sub> | 814.8  | 0.03  |        |      | v <sub>47</sub> (A'') | 743.6  | <0.01  |        |      |
|                 |        |       | 794.6  | 0.37 | v <sub>40</sub> | 714.6  | 0.03  |        |      | v <sub>24</sub> (A')  | 706.5  | 0.07   | 687.4  | 0.69 |
| v <sub>40</sub> | 721.6  | 0.05  | 727.4  | 0.36 | v <sub>41</sub> | 701.9  | 0.12  | 707.2  | 0.55 | v <sub>48</sub> (A'') | 633.0  | 0.27   | 628.2  | 0.52 |
| v <sub>41</sub> | 703.2  | 0.10  | 709.3  | 0.45 |                 |        |       | 666.2  | 0.45 |                       |        |        | 603.3  | 0.72 |
|                 |        |       | 693.0  | 0.17 | v <sub>42</sub> | 632.6  | 0.3   | 624.2  | 0.53 | v <sub>25</sub> (A')  | 544.2  | 0.06   |        |      |
| v <sub>42</sub> | 632.6  | 0.27  | 640.5  | 0.87 | v <sub>43</sub> | 550.6  | <0.01 | 529.2  | 0.48 | v <sub>26</sub> (A')  | 496.5  | 0.09   |        |      |
| v <sub>43</sub> | 551.0  | 0.01  |        |      | v <sub>44</sub> | 478.7  | 0.19  |        |      | v <sub>49</sub> (A'') | 420.4  | <0.01  |        |      |
| v <sub>44</sub> | 478.4  | 0.12  | 481.1  | 0.43 | v <sub>45</sub> | 423.3  | 0.08  |        |      | v <sub>50</sub> (A'') | 413.0  | <0.01  |        |      |
| v <sub>45</sub> | 428.3  | 0.17  | 432.1  | 0.42 | v <sub>46</sub> | 419.1  | 0.32  | 425.7  | 0.41 |                       |        |        |        |      |
| v <sub>46</sub> | 418.3  | 0.19  | 423.1  | 0.50 | v <sub>47</sub> | 413.6  | <0.01 |        |      |                       |        |        |        |      |
| v <sub>47</sub> | 413.9  | 0.03  | 406.8  | 0.19 |                 |        |       |        |      |                       |        |        |        |      |

<sup>a</sup> Also given are the symmetry species (A' and A'') of the different modes.

**Table S2.** Atomic charges, obtained from natural bond orbital analysis at the M06-2X/6-311++G(d,p) level of theory for the G1, G2, A1 and A2 conformers of 2-(4-fluoro-phenyl)-ethylamine (4-FPEA) and 2-phenylethylamine (PEA).

|        | 4-FPEA           |                  |                  |                  | PEA              |                  |                  |                  |
|--------|------------------|------------------|------------------|------------------|------------------|------------------|------------------|------------------|
|        | G1               | G2               | A1               | A2               | G1               | G2               | A1               | A2               |
| C1     | -0.058210        | -0.056740        | -0.050620        | -0.053480        | -0.040480        | -0.039160        | -0.032930        | -0.035900        |
| C2     | -0.193670        | -0.196960        | -0.187200        | -0.188240        | -0.214970        | -0.217460        | -0.208040        | -0.209040        |
| C3     | -0.269210        | -0.268480        | -0.267410        | -0.266680        | -0.202740        | -0.201890        | -0.201430        | -0.200670        |
| C4     | 0.410020         | 0.410680         | 0.410290         | 0.410660         | -0.217030        | -0.216190        | -0.216640        | -0.216170        |
| C5     | -0.267980        | -0.265250        | -0.268030        | -0.266680        | -0.202000        | -0.199770        | -0.201910        | -0.200670        |
| C6     | -0.190760        | -0.189530        | -0.188940        | -0.188240        | -0.211650        | -0.210570        | -0.209780        | -0.209040        |
| H14    | 0.210390         | 0.211320         | 0.209670         | 0.210180         | 0.206570         | 0.207450         | 0.205760         | 0.206270         |
| H15    | 0.227700         | 0.228630         | 0.227550         | 0.228090         | 0.208930         | 0.209840         | 0.208680         | 0.209220         |
| F(H)16 | -0.358520        | -0.357430        | -0.358520        | -0.357940        | 0.209660         | 0.210480         | 0.209520         | 0.209960         |
| H17    | 0.228450         | 0.228630         | 0.227850         | 0.228090         | 0.209690         | 0.209800         | 0.208990         | 0.209220         |
| H18    | 0.220660         | 0.210960         | 0.212050         | 0.210180         | 0.216380         | 0.207050         | 0.208170         | 0.206270         |
| sum    | <b>-0.041130</b> | <b>-0.044170</b> | <b>-0.033310</b> | <b>-0.034060</b> | <b>-0.037640</b> | <b>-0.040420</b> | <b>-0.029610</b> | <b>-0.030550</b> |
| C7     | -0.410980        | -0.421250        | -0.411360        | -0.420130        | -0.412740        | -0.422740        | -0.41263         | -0.421360        |
| C8     | -0.174540        | -0.178320        | -0.173360        | -0.177370        | -0.173890        | -0.177790        | -0.1731          | -0.177050        |
| H9     | 0.188690         | 0.188740         | 0.162460         | 0.187140         | 0.187520         | 0.187670         | 0.16263          | 0.187250         |
| H10    | 0.160240         | 0.185100         | 0.186690         | 0.187140         | 0.160170         | 0.185210         | 0.18676          | 0.187260         |
| H12    | 0.211750         | 0.213940         | 0.201460         | 0.203460         | 0.211570         | 0.213590         | 0.20071          | 0.202770         |
| H13    | 0.215970         | 0.202500         | 0.218790         | 0.203460         | 0.215290         | 0.201600         | 0.21808          | 0.202770         |
| N11    | -0.863320        | -0.847900        | -0.855100        | -0.845170        | -0.863170        | -0.848450        | -0.85507         | -0.845430        |
| H19    | 0.356880         | 0.345440         | 0.347310         | 0.347770         | 0.357860         | 0.344750         | 0.35548          | 0.347170         |
| H20    | 0.356450         | 0.355910         | 0.356410         | 0.347770         | 0.355060         | 0.356580         | 0.34675          | 0.347170         |
| sum    | <b>0.041140</b>  | <b>0.044160</b>  | <b>0.033300</b>  | <b>0.034070</b>  | <b>0.037670</b>  | <b>0.040420</b>  | <b>0.029610</b>  | <b>0.030550</b>  |

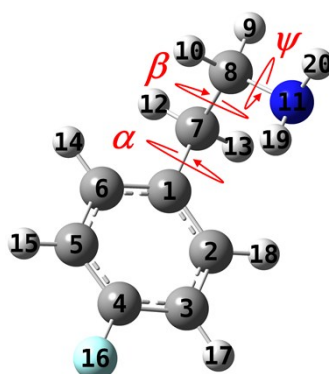

Supplement: c6cp06456f1.pdf [file c6cp06456f1.pdf]
